# Supplementary material
Source: PubMed Central journal article supplement (PMC5035649)
Supplement: NIHMS816672-supplement.pdf [file NIHMS816672-supplement.pdf]

## Supplemental Text:

### Hypoxia image analysis.

The degree of hypoxia was determined based on visible contrast of the tumor relative to muscle ( $>1.2$ ) on the late 180 min  $^{18}\text{F}$ -FMISO PET image and on the results of a compartmental model quantifying the rate of irreversible trapping. The model consisted of an instantaneously equilibrating vascular space plus two catenary compartments described by three rate constants,  $k_1$ ,  $k_2$  and  $k_3$ , where  $k_3$  parameterized the rate of trapping (i.e. putatively, the degree of hypoxia). Prior simulations that included noise estimates suggested that  $k_3$  values below  $0.001 \text{ min}^{-1}$  could not be reliably distinguished from zero and therefore tumors having  $k_3$  values above this threshold were considered hypoxic.

### Statistical Design:

This trial is not a randomized trial comparing patients who receive standard dose radiation versus reduced dose radiation which would entail a complex non-inferiority statistical design with large patient numbers. This is a pilot imaging biomarker study set out to prove the concept that reducing the dose of radiation based on hypoxia imaging response does not compromise locoregional control. Given it was a pilot study to assess feasibility and generate preliminary evidence for efficacy, no formal sample size justification was done or required for this small sub-cohort of a large IRB approved study. However, to roughly assess the probability of achieving our expectation based on this small sample, we provide the following table as a guideline. We have de-escalated 10 patients out of the 33 patients enrolled.

|                                                 |      |      |      |      |      |      |      |      |      |
|-------------------------------------------------|------|------|------|------|------|------|------|------|------|
| True response rate                              | 50%  | 55%  | 60%  | 65%  | 70%  | 75%  | 80%  | 85%  | 90%  |
| Prob. of $\geq 8$ responses out of 10 patients  | 0.05 | 0.10 | 0.17 | 0.26 | 0.38 | 0.53 | 0.68 | 0.82 | 0.93 |
| Prob. of $\geq 12$ responses out of 15 patients | 0.02 | 0.04 | 0.09 | 0.17 | 0.30 | 0.46 | 0.65 | 0.82 | 0.94 |
